# Supplementary material for: α-Fe2O3 nanomaterials strengthened the growth promoting effect of Pseudomonas aurantiaca strain JD37 on alfalfa via enhancing the nutrient interaction of the plant–rhizobacteria symbiont
Source: Royal Society of Chemistry journal article supplement (doi:10.1039/d3en00236e), 2023-01-01
Supplement: d3en00236e1.pdf [file d3en00236e1.pdf]

## **Supporting Information**

### **$\alpha$ -Fe<sub>2</sub>O<sub>3</sub> nanomaterials strengthened the growth promoting effect of *Pseudomonas aurantiaca* strain JD37 on alfalfa via enhancing the nutrient interaction of plant-rhizobacteria symbiont**

Tianying Zheng<sup>a</sup>, Ting Wu<sup>a</sup>, Jie Hou<sup>a\*</sup>, Daohui Lin<sup>a, b</sup>

<sup>a</sup> Zhejiang Provincial Key Laboratory of Organic Pollution Process and Control, Department of Environmental Science, Zhejiang University, Hangzhou 310058, China

<sup>b</sup> Zhejiang Ecological Civilization Academy, Anji 313300, China

\*Corresponding author: J. Hou ([hou-jie@zju.edu.cn](mailto:hou-jie@zju.edu.cn))

Supporting Information consists of 8 pages, including 2 text, 4 tables and 6 figures.

## Supporting Text

### Text S1 Inorganic salt solution formulations

2.8 g/L Na<sub>2</sub>HPO<sub>4</sub>, 1.0 g/L KH<sub>2</sub>PO<sub>4</sub>, 0.5 g/L (NH<sub>4</sub>)<sub>2</sub>SO<sub>4</sub>, 0.001 mg/L CuCl<sub>2</sub>·2H<sub>2</sub>O, 0.5 mg/L Na<sub>2</sub>EDTA, 0.03 mg/L H<sub>3</sub>BO<sub>3</sub>, 0.02 mg/L CoCl<sub>2</sub>·6H<sub>2</sub>O, 0.2 mg/L FeSO<sub>4</sub>·7H<sub>2</sub>O, 0.01 mg/L ZnSO<sub>4</sub>·7H<sub>2</sub>O, 0.003 mg/L MnCl<sub>2</sub>·4H<sub>2</sub>O, 0.003 mg/L Na<sub>2</sub>MoO<sub>4</sub>·2H<sub>2</sub>O, 0.002 mg/L NiCl<sub>2</sub>·6H<sub>2</sub>O, 0.113 µg/L MgCl<sub>2</sub>·6H<sub>2</sub>O, 0.05 mg/L Ca(NO<sub>3</sub>)<sub>2</sub>·4H<sub>2</sub>O. The chemicals were purchased from Beijing Coolaber technology Co., China.

### Text S2 Genetical evidence for the conformation of JD37 in the rhizosphere

JD37 (*Pseudomonas chlororaphis* subsp. *aurantiaca* JD37) is a plant growth-promoting rhizobacterium, a Gram-negative bacterium isolated from potato rhizosphere soil (Shanghai, China)<sup>1</sup>. To identify the colonization of JD37 in the rhizosphere, the total DNA in soil was extracted with the E.Z.N.A soil DNA Kit (Omega Biotek, USA) by Majorbio. Inc., China. Then the DNA concentration and purity were evaluated by a UV-vis spectrophotometer (NanoDrop 2000, Thermo Scientific, USA), and the DNA quality was assessed by agarose gel electrophoresis. According to the information of JD37<sup>1,2</sup>, a pair of primers (F: ACCACCTGGACTGATACTGA, R: AAGGGCCATGATGACTTG; NCBI Accession number: OM698823; Product size: 480 bp.) was designed. qPCR reactions were performed using a real-time PCR system (Applied Biosystems StepOnePlus, CA) to amplify the genes of JD37<sup>3</sup>. The program setup was as these three stages below: 95 °C for 10 min; 35 cycles of 95 °C for 10 s, 50 °C for 10 s, and then 72 °C for 20 s; followed by a melt curve for specificity verification. Amplification reactions were performed with a final volume of 23.8 µL including 10 µL of SYBR Green ChemoHS qPCR Mix (Monad, China), 0.4 µL of forward primer, 0.4 µL of reverse primer and 5 µL of DNA template. The integrities and forms of soil DNA were analyzed with electrophoresis on a 1.0% agarose gel stained with 2% DuRed 10000× (Bridgen, China). Bands were visualized by a gel imaging system (Syngene, U.K.). Finally, the band brightness was quantified using image J software with 3 replicates.

## Supporting Tables

**Table S1 Resulting table of McFarland method**

| Tube number (McFarland)                                        | 0.5    | 1      | 2      | 3      | 4      |
|----------------------------------------------------------------|--------|--------|--------|--------|--------|
| 1% BaCl <sub>2</sub> (mL)                                      | 0.05   | 0.1    | 0.2    | 0.3    | 0.4    |
| 1% H <sub>2</sub> SO <sub>4</sub> (mL)                         | 9.95   | 9.9    | 9.8    | 9.7    | 9.6    |
| the approximate bacteria concentration ( $\times 10^8$ CFU/mL) | 1.5    | 3      | 6      | 9      | 12     |
| OD <sub>600</sub> *                                            | 0.1006 | 0.1446 | 0.2375 | 0.3342 | 0.4037 |

\*The average of measured OD<sub>600</sub>, n=3.

**Table S2 Original soil minerals contents**

| Minerals                       | Contents          |
|--------------------------------|-------------------|
| SiO <sub>2</sub>               | 68.28 $\pm$ 5.81% |
| Al <sub>2</sub> O <sub>3</sub> | 17.42 $\pm$ 2.60% |
| Fe <sub>2</sub> O <sub>3</sub> | 4.96 $\pm$ 0.74%  |
| K <sub>2</sub> O               | 2.41 $\pm$ 0.92%  |
| MgO                            | 1.36 $\pm$ 1.37%  |
| CaO                            | 1.09 $\pm$ 0.63%  |
| Na <sub>2</sub> O              | 1.02 $\pm$ 1.94%  |
| TiO <sub>2</sub>               | 0.66 $\pm$ 0.91%  |
| P <sub>2</sub> O <sub>5</sub>  | 0.15 $\pm$ 0.32%  |

**Table S3 Metabolic pathways with significant differences caused by treatments related to  $1.5 \times 10^9$  CFU/plant JD37**

| Treatment  | Number of differential metabolic pathways | Metabolic pathways                                                                                                                                                                                                                                                |
|------------|-------------------------------------------|-------------------------------------------------------------------------------------------------------------------------------------------------------------------------------------------------------------------------------------------------------------------|
| 9F vs CKN  | 8                                         | (1)Fatty acid biosynthesis; (2)Pyrimidine metabolism; (3)Pentose and glucuronate interconversions; (4)Butanoate metabolism; (5)Glycerolipid metabolism; (6)Galactose metabolism; (7)Starch and sucrose metabolism; (8)Alanine, aspartate and glutamate metabolism |
| 9F vs 9N   | 4                                         | (1)Fatty acid biosynthesis; (2)Pyrimidine metabolism; (3)Pentose and glucuronate interconversions; (4)Glycerolipid metabolism                                                                                                                                     |
| CKF vs CKN | 4                                         | (1)Pyrimidine metabolism; (2)Pentose and glucuronate interconversions; (3)Ascorbate and aldarate metabolism; (4)Inositol phosphate metabolism;                                                                                                                    |
| 9F vs CKF  | 3                                         | (1)Fatty acid biosynthesis; (2)Pyrimidine metabolism; (3)Pentose and glucuronate interconversions                                                                                                                                                                 |
| 9N vs CKN  | 3                                         | (1)Pyrimidine metabolism; (2)Pentose and glucuronate interconversions; (3)Butanoate metabolism                                                                                                                                                                    |

**Table S4 Metabolic pathways with significant differences caused by treatments related to  $1.5 \times 10^8$  CFU/plantJD37**

| Treatment  | Number of differential metabolic pathways | Metabolic pathways                                                                                                                                                                                                                                |
|------------|-------------------------------------------|---------------------------------------------------------------------------------------------------------------------------------------------------------------------------------------------------------------------------------------------------|
| 8F vs CKN  | 7                                         | (1)Fatty acid biosynthesis; (2)Inositol phosphate metabolism; (3)Pentose and glucuronate interconversions; (4)Pyrimidine metabolism; (5)Ascorbate and aldarate metabolism;(6)Butanoate metabolism; (7)Alanine, aspartate and glutamate metabolism |
| 8F vs 8N   | 2                                         | (1)Pentose and glucuronate interconversions; (2)Pyrimidine metabolism                                                                                                                                                                             |
| CKF vs CKN | 4                                         | (1)Pyrimidine metabolism; (2)Pentose and glucuronate interconversions; (3)Inositol phosphate metabolism; (4)Ascorbate and aldarate metabolism                                                                                                     |
| 8F vs CKF  | 2                                         | (1)Ascorbate and aldarate metabolism; (2)Inositol phosphate metabolism                                                                                                                                                                            |
| 8N vs CKN  | 2                                         | (1)Butanoate metabolism; (2)Alanine, aspartate and glutamate metabolism                                                                                                                                                                           |

## Supporting Figures

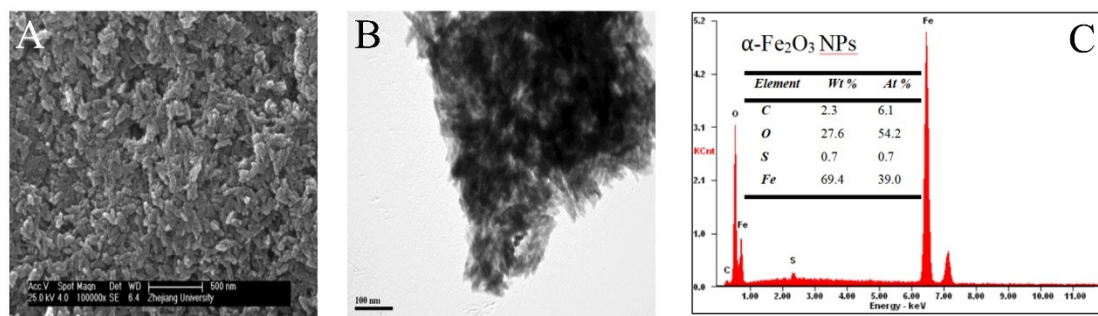

**Fig S1. SEM (A), TEM (B) images and EDS analyses (C) of  $\alpha$ -Fe<sub>2</sub>O<sub>3</sub> (The data was adopted from our previous study<sup>4</sup>).**

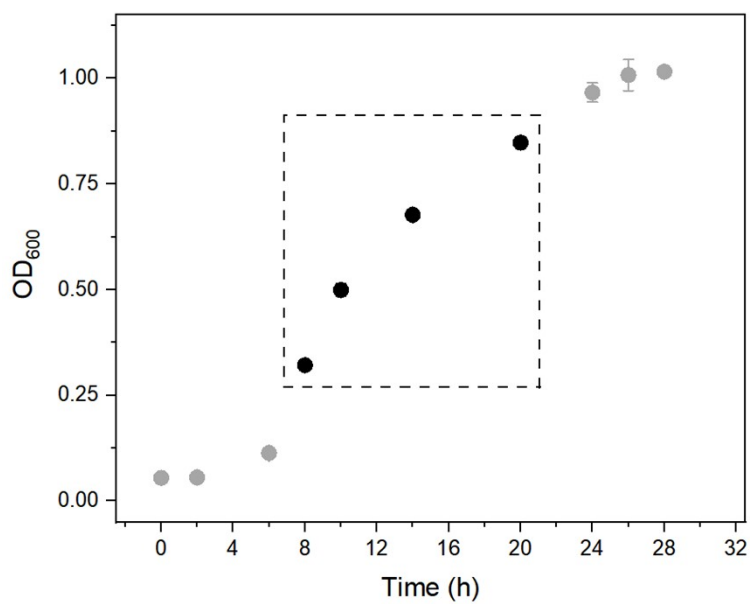

**Fig. S2 JD37 growth kinetics within 32 h.**

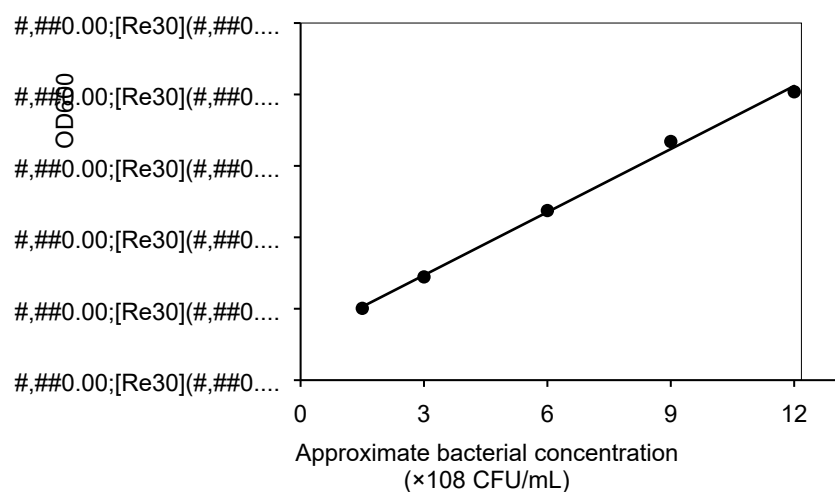

**Fig. S3 Linear relationship between the turbidity and the concentration of bacteria.**

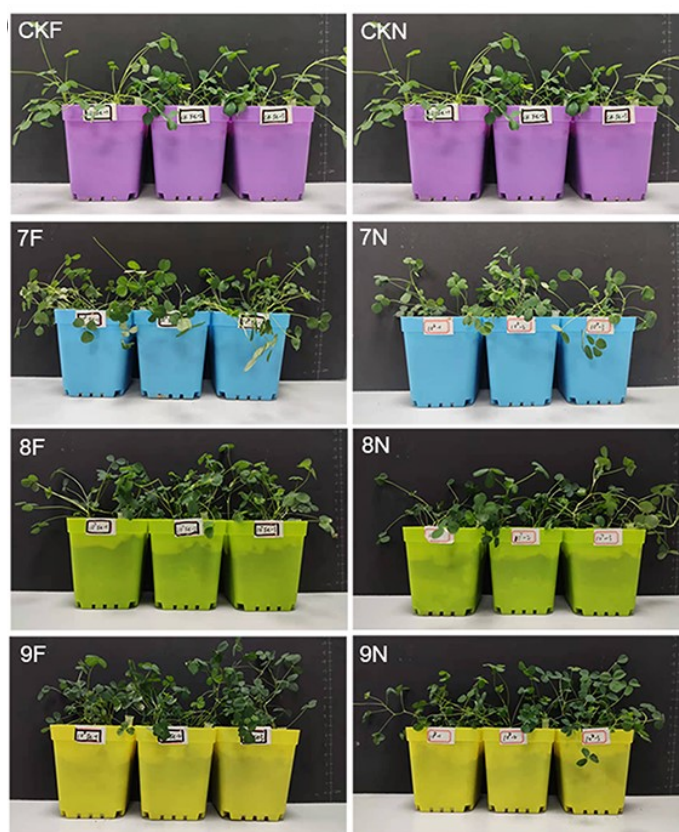

**Fig. S4 Overall physical appearance of alfalfa plants in soil treated by JD37 with or without  $\alpha$ -Fe<sub>2</sub>O<sub>3</sub> NMs after 65 d. Abbreviations for different treatments: (1) CKF: 1000 mg/kg  $\alpha$ -Fe<sub>2</sub>O<sub>3</sub> NMs, (2) 7F: 1000 mg/kg  $\alpha$ -Fe<sub>2</sub>O<sub>3</sub> NMs and  $1.5 \times 10^7$  CFU/plant JD37, (3) 8F: 1000 mg/kg  $\alpha$ -Fe<sub>2</sub>O<sub>3</sub> NMs and  $1.5 \times 10^8$  CFU/plant JD37,**

(4) 9F: 1000 mg/kg  $\alpha$ -Fe<sub>2</sub>O<sub>3</sub> NMs and 1.5×10<sup>9</sup> CFU/plant JD37, (5) CKN: The control group without NMs or PGPR; (6) 7N: 1.5×10<sup>7</sup> CFU/plant JD37, (7) 8N: 1.5×10<sup>8</sup> CFU/plant JD37, (8) 9N: 1.5×10<sup>9</sup> CFU/plant JD37.

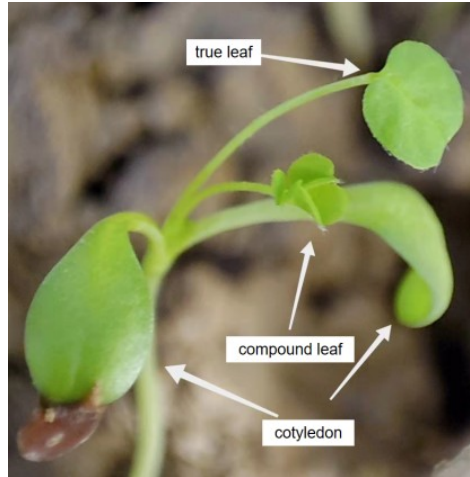

Fig. S5 The cotyledons, true leaf and compound leaf of alfalfa.

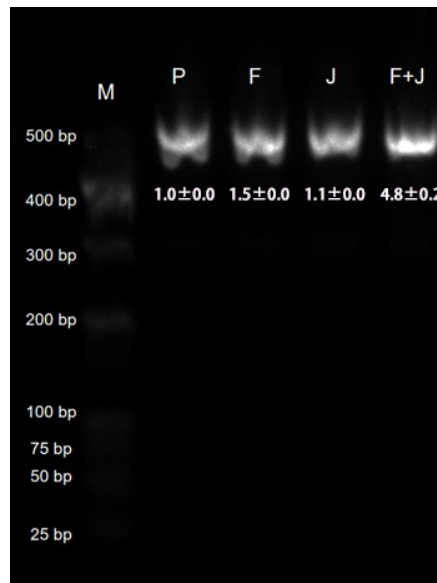

Fig. S6 Agarose gel electrophoresis of JD37 16s rRNA from the rhizosphere soil. P: control, F: treatment applied with 1000 mg/kg  $\alpha$ -Fe<sub>2</sub>O<sub>3</sub> NMs, J: treatment applied with 1.5×10<sup>9</sup> CFU/plant JD37, F+J: treatment applied with 1000 mg/kg  $\alpha$ -Fe<sub>2</sub>O<sub>3</sub> NMs and 1.5×10<sup>9</sup> CFU/plant JD37). The numbers below the bands represent the relative value of light intensity measured by the image J software.



## References

- 1 Q. Y. Jiang, J. Xiao, C. H. Zhou, Y. L. Mu, B. Xu, Q. L. He and M. Xiao, Complete genome sequence of the plant growth-promoting rhizobacterium *Pseudomonas aurantiaca* strain JD37, *J. Biotechnol.*, 2014, **192**, 85-86.
- 2 L. Zhang, W. B. Chen, Q. Y. Jiang, Z. J. Fei and M. Xiao, Genome analysis of plant growth-promoting rhizobacterium *Pseudomonas chlororaphis* subsp. *aurantiaca* JD37 and insights from comparasion of genomics with three *Pseudomonas* strains, *Microbiol. Res.*, 2020, **237**, 126483.
- 3 X. Lu, J. Hou, K. Yang, L. Zhu, B. Xing and D. Lin, Binding Force and Site-Determined Desorption and Fragmentation of Antibiotic Resistance Genes from Metallic Nanomaterials, *Environ. Sci. Technol.*, 2021, **55**, 9305-9316.
- 4 C. Lei, L. Q. Zhang, K. Yang, L. Z. Zhu and D. H. Lin, Toxicity of iron-based nanoparticles to green algae: Effects of particle size, crystal phase, oxidation state and environmental aging, *Environ. Pollut.*, 2016, **218**, 505-512.
